# Supplementary material
Source: Springer Nature journal article supplement (https://www.springermedizin.de/resource/supplementary/12993_2007_142_MOESM1_ESM.pdf/9617294)

## Control subject

Control Period: -0.2 sec to 0.0 sec

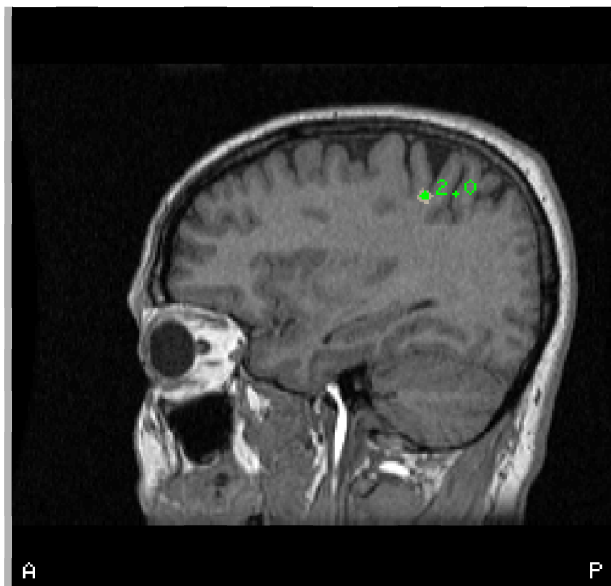

Slice: 96 of 256  
(Sagittal)

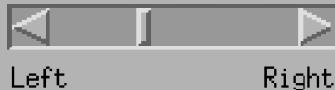

Active Period: 0.0 sec to 0.2 sec

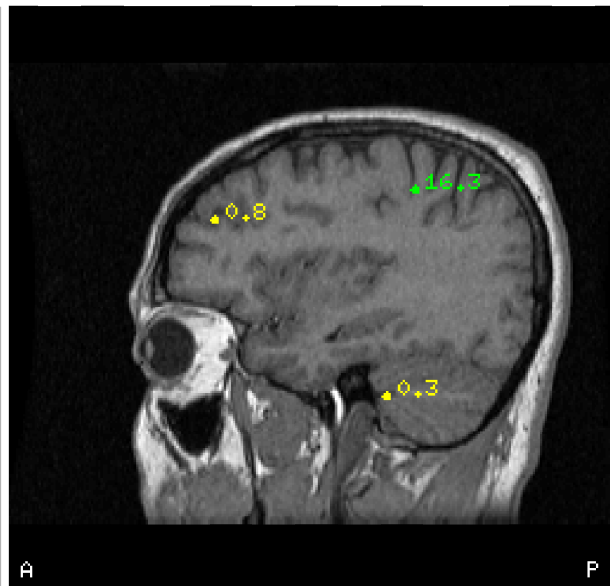

Slice: 93 of 256  
(Sagittal)

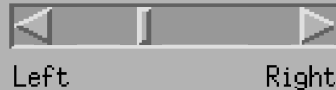

Supplement: MOESM1 [file 9617294]
